# Supplementary material for: Polyoxometalate ionic liquid between graphene oxide surfaces as a new membrane in the desalination process: a molecular dynamics study
Source: Royal Society of Chemistry journal article supplement (doi:10.1039/d2cp05486h), 2023-01-01
Supplement: d2cp05486h1.pdf [file d2cp05486h1.pdf]

## Supporting Information

# **Polyoxometalate ionic liquid between graphene oxide surfaces as a new membrane in desalination process:**

## **A molecular dynamics study**

Mohsen Abbaspour\*

*Dep. of Chemistry, Hakim Sabzevari University, Sabzevar, Iran*

**Table S1.** The Dreiding non-bonded parameters

|                               | mass    | charge | $\sigma$ (Å) | $\epsilon$ (kcal/mol) |
|-------------------------------|---------|--------|--------------|-----------------------|
| C_2, Carbon(SP <sup>2</sup> ) | 12.011  | 0      | 3.55         | 0.07                  |
| C_3, Carbon(C bonded to OH)   | 12.011  | 0.15   | 3.55         | 0.07                  |
| OH (O in OH group)            | 15.9994 | -0.585 | 3.07         | 0.1699                |
| HO (H in OH group)            | 1.008   | 0.435  | 0            | 0                     |

**Table S2.** Bond stretching parameters (harmonic potential)\*

| i   | j   | $r_o$ (Å) | $k_b$ (kcal/mol Å <sup>2</sup> ) |
|-----|-----|-----------|----------------------------------|
| C_2 | C_2 | 1.33      | 1400.0                           |
| C_3 | C_3 | 1.53      | 700.0                            |
| C_3 | OH  | 1.42      | 700.0                            |
| OH  | HO  | 0.98      | 700.0                            |

**Table S3.** Angle bending parameters (hcos potential)\*

| i   | j   | k   | $\theta_o$ (deg) | $k_\theta$ (kcal/mol) |
|-----|-----|-----|------------------|-----------------------|
| C_2 | C_2 | C_3 | 120              | 133.33                |
| C_2 | C_2 | C_2 | 120              | 133.33                |
| C_2 | C_3 | C_3 | 109.47           | 112.49                |
| C_3 | OH  | HO  | 104.51           | 106.69                |
| C_3 | C_3 | OH  | 109.47           | 112.49                |
| C_2 | C_3 | OH  | 109.47           | 112.49                |

**Table S4.** Dihedral parameters (cos potential)\*

| l   | A (kcal/mol) | m      | $\delta$ |
|-----|--------------|--------|----------|
| C_2 | 1.25         | 180.0  | 2.0      |
| C_2 | 1.25         | 180.0  | 2.0      |
| C_2 | 0.11         | 0.0    | 3.0      |
| C_3 | 0.083        | -180.0 | 6.0      |
| OH  | 0.11         | 0.0    | 3.0      |
| HO  | 0.33         | 0.0    | 3.0      |

\* The dihedral parameters have been produced using the gui utility of DLPOLY software in which some parameters may be different according to the positions of atoms or kinds of bonds.

**Table S5.** The LJ parameters of the cation and anion of the polyoxometallate IL used in this work

|             | Charge (e) | $\epsilon$ (kcal/mol) | $\sigma$ (Å) |
|-------------|------------|-----------------------|--------------|
| P           | 1.51       | 0.2455                | 3            |
| W           | 3.81       | 0.221292              | 2.34         |
| Obt         | -0.85      | 0.214713              | 3.17         |
| Ob1         | -1.37      | 0.214713              | 3.17         |
| Ob2         | -1.55      | 0.214713              | 3.17         |
| CR          | -0.11      | 0.07                  | 3.55         |
| NA          | 0.15       | 0.17                  | 3.25         |
| HW=HR       | 0.21       | 0.03                  | 2.42         |
| CM          | -0.17      | 0.066                 | 3.5          |
| HM=HA=HT=HS | 0.13       | 0.03                  | 2.5          |
| CW          | -0.13      | 0.066                 | 3.5          |

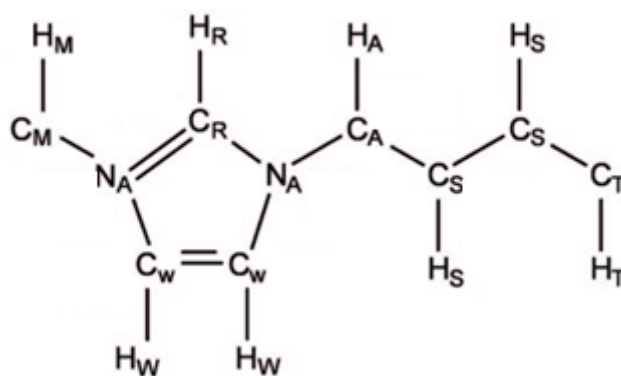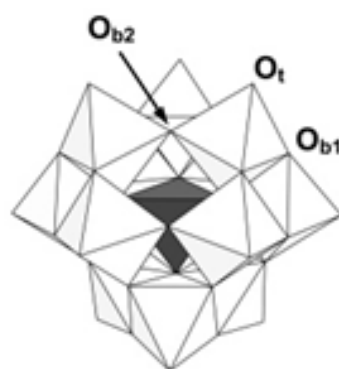

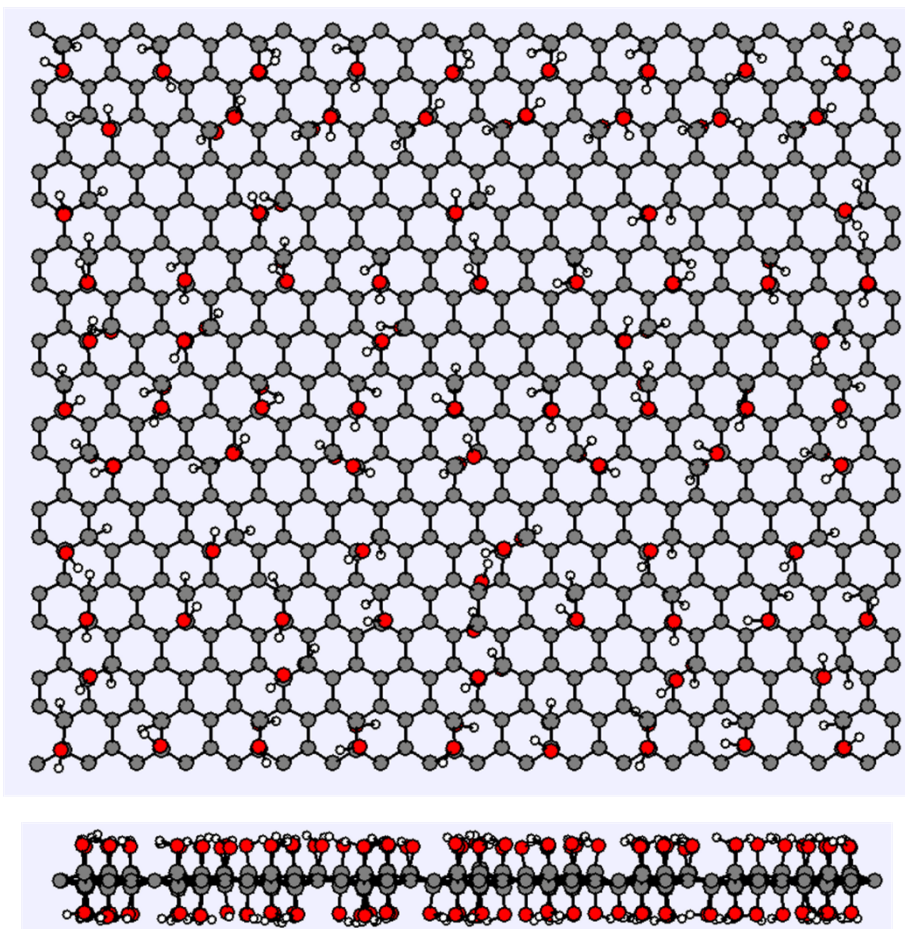

**Fig. S1.** The snapshots of the GO surface used in the simulations of this work.

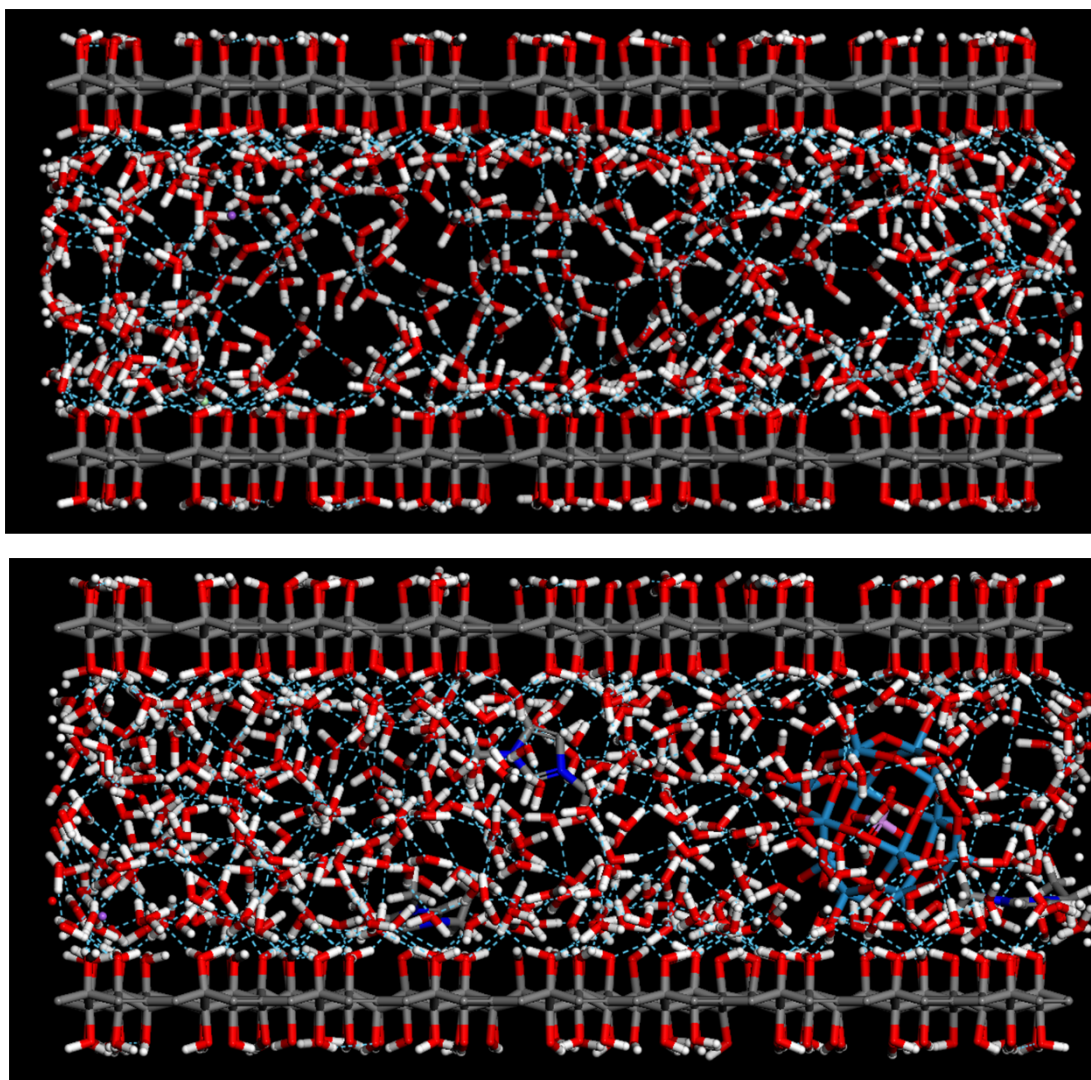

**Fig. S2.** The snapshots of the HBs (shown by dashed blue lines) for empty-GO and 1IL-GO systems. The HB cutoff distance ( $2.88 \text{ \AA}$ ) and the HB angle of  $150^\circ$  were used as the criteria in this figure. The O, H, P, W, N, and C atoms are in red, white, pink, light blue, dark blue, and gray, respectively.
